# Supplementary material for: A Myosin II-Based Nanomachine Devised for the Study of Ca2+-Dependent Mechanisms of Muscle Regulation
Source: Int J Mol Sci. 2020 Oct 6;21(19):7372. doi: 10.3390/ijms21197372 (PMC7583892; doi:10.3390/ijms21197372)
Supplement: Supplementary file 1 [file ijms-21-07372-s001.docx]

**Supplementary Materials**

**
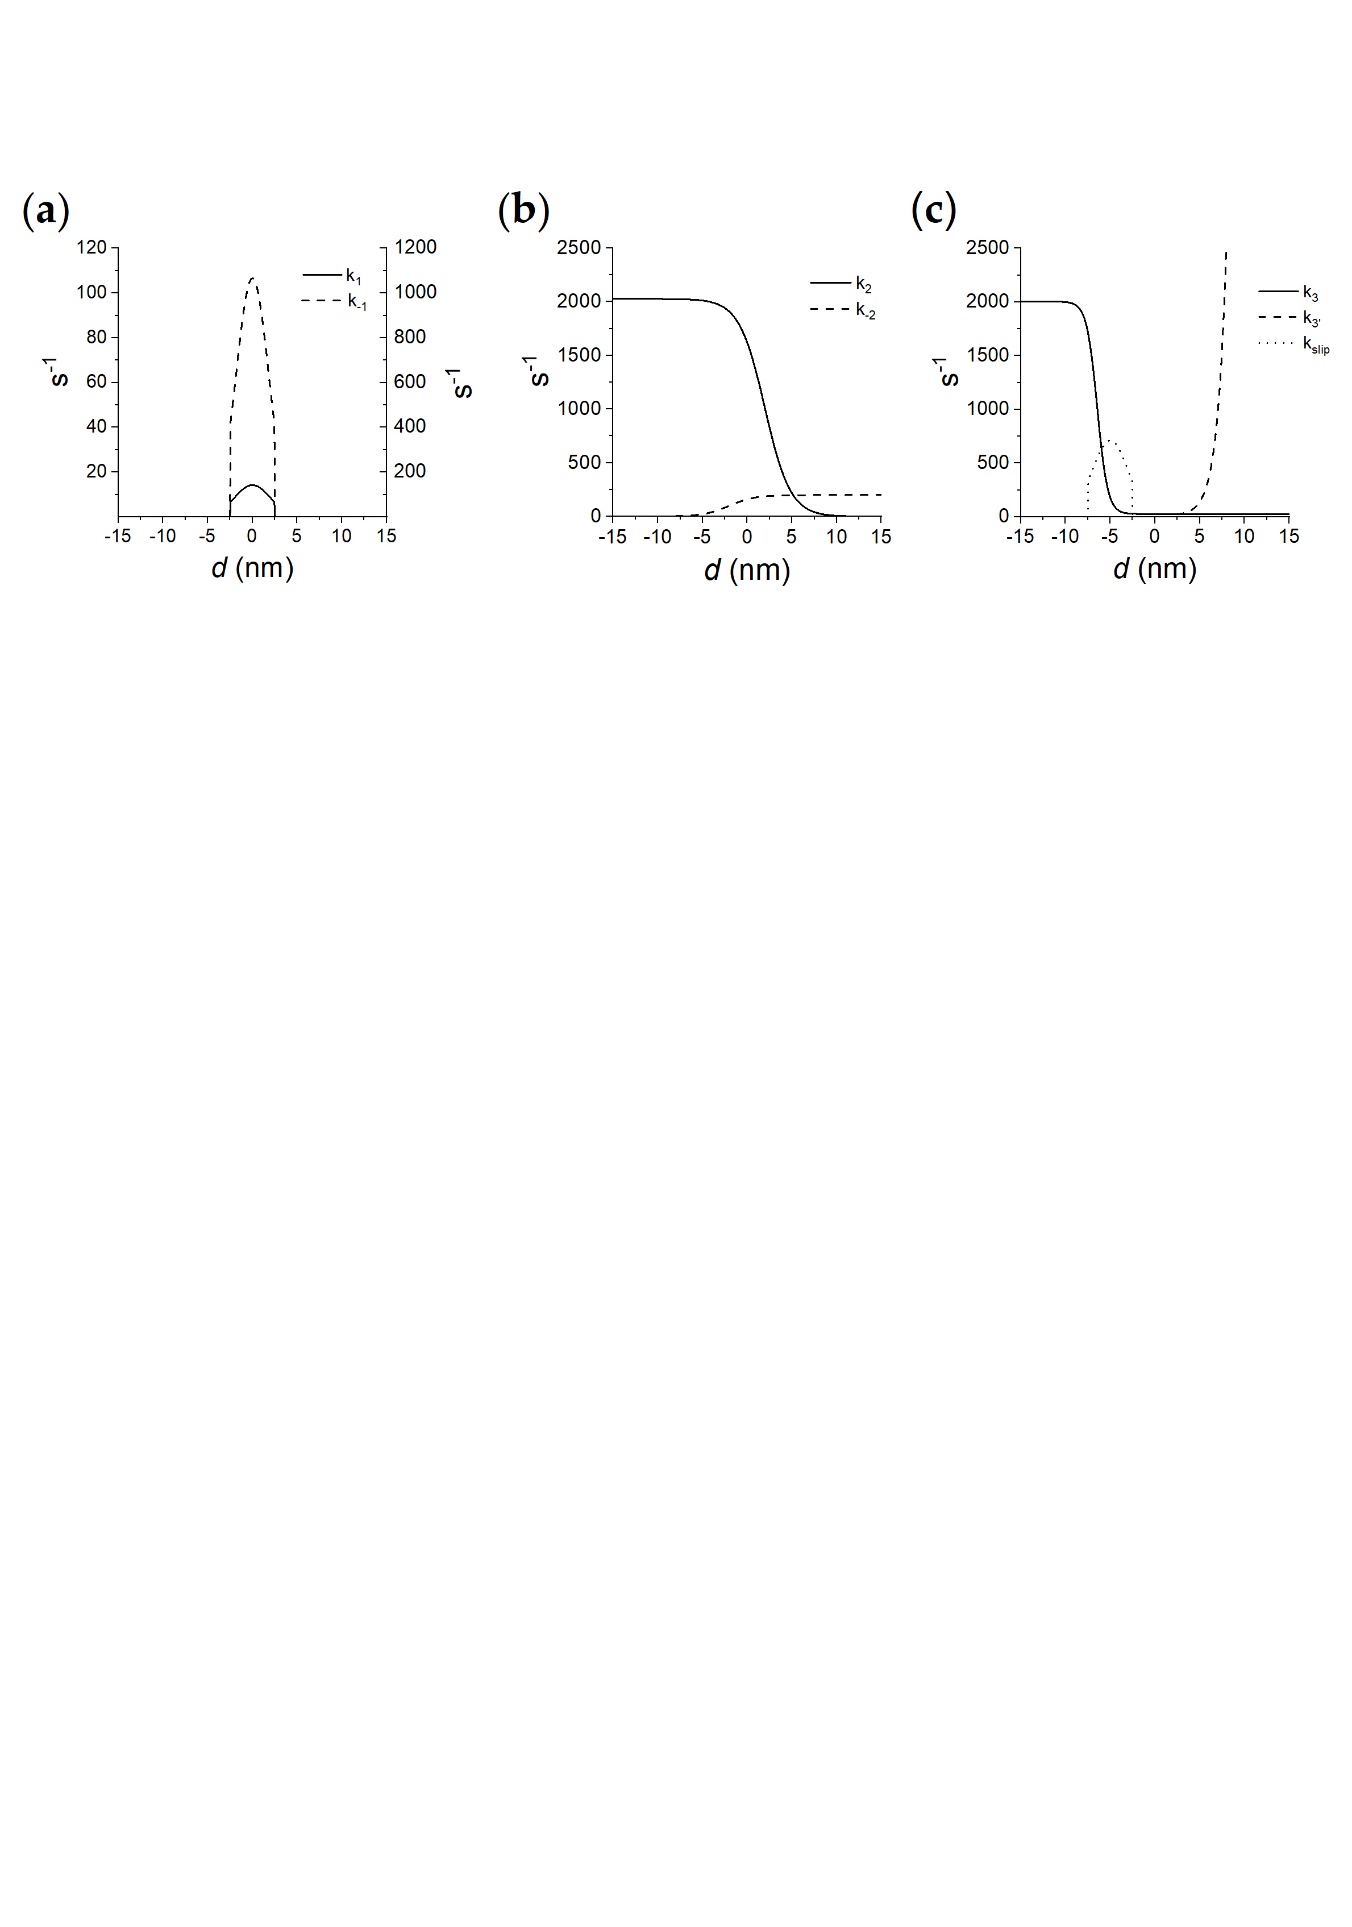
**

**Supplementary Fig. 1.** Dependence of the rate functions for the state transitions on *d*, the relative position between the motor and the actin monomer, taken as zero when the motor in the A1 state exerts zero force. Where the transition is reversible, ki is the forward and k-i is the backward rate constant. **(a)** step 1, attachment reaction, k1 continuous line, k-1 dashed line. **(b)** Step 2, force generating transition, k2 continuous line, k-2 dashed line. **(c)** Step 3, detachment reaction, k3 continuous line. The slipping of A2 to the next actin farther from the centre of the sarcomere is governed by kslip (dotted line). Detachment from an attached state following slipping, k3’ dashed line.

**
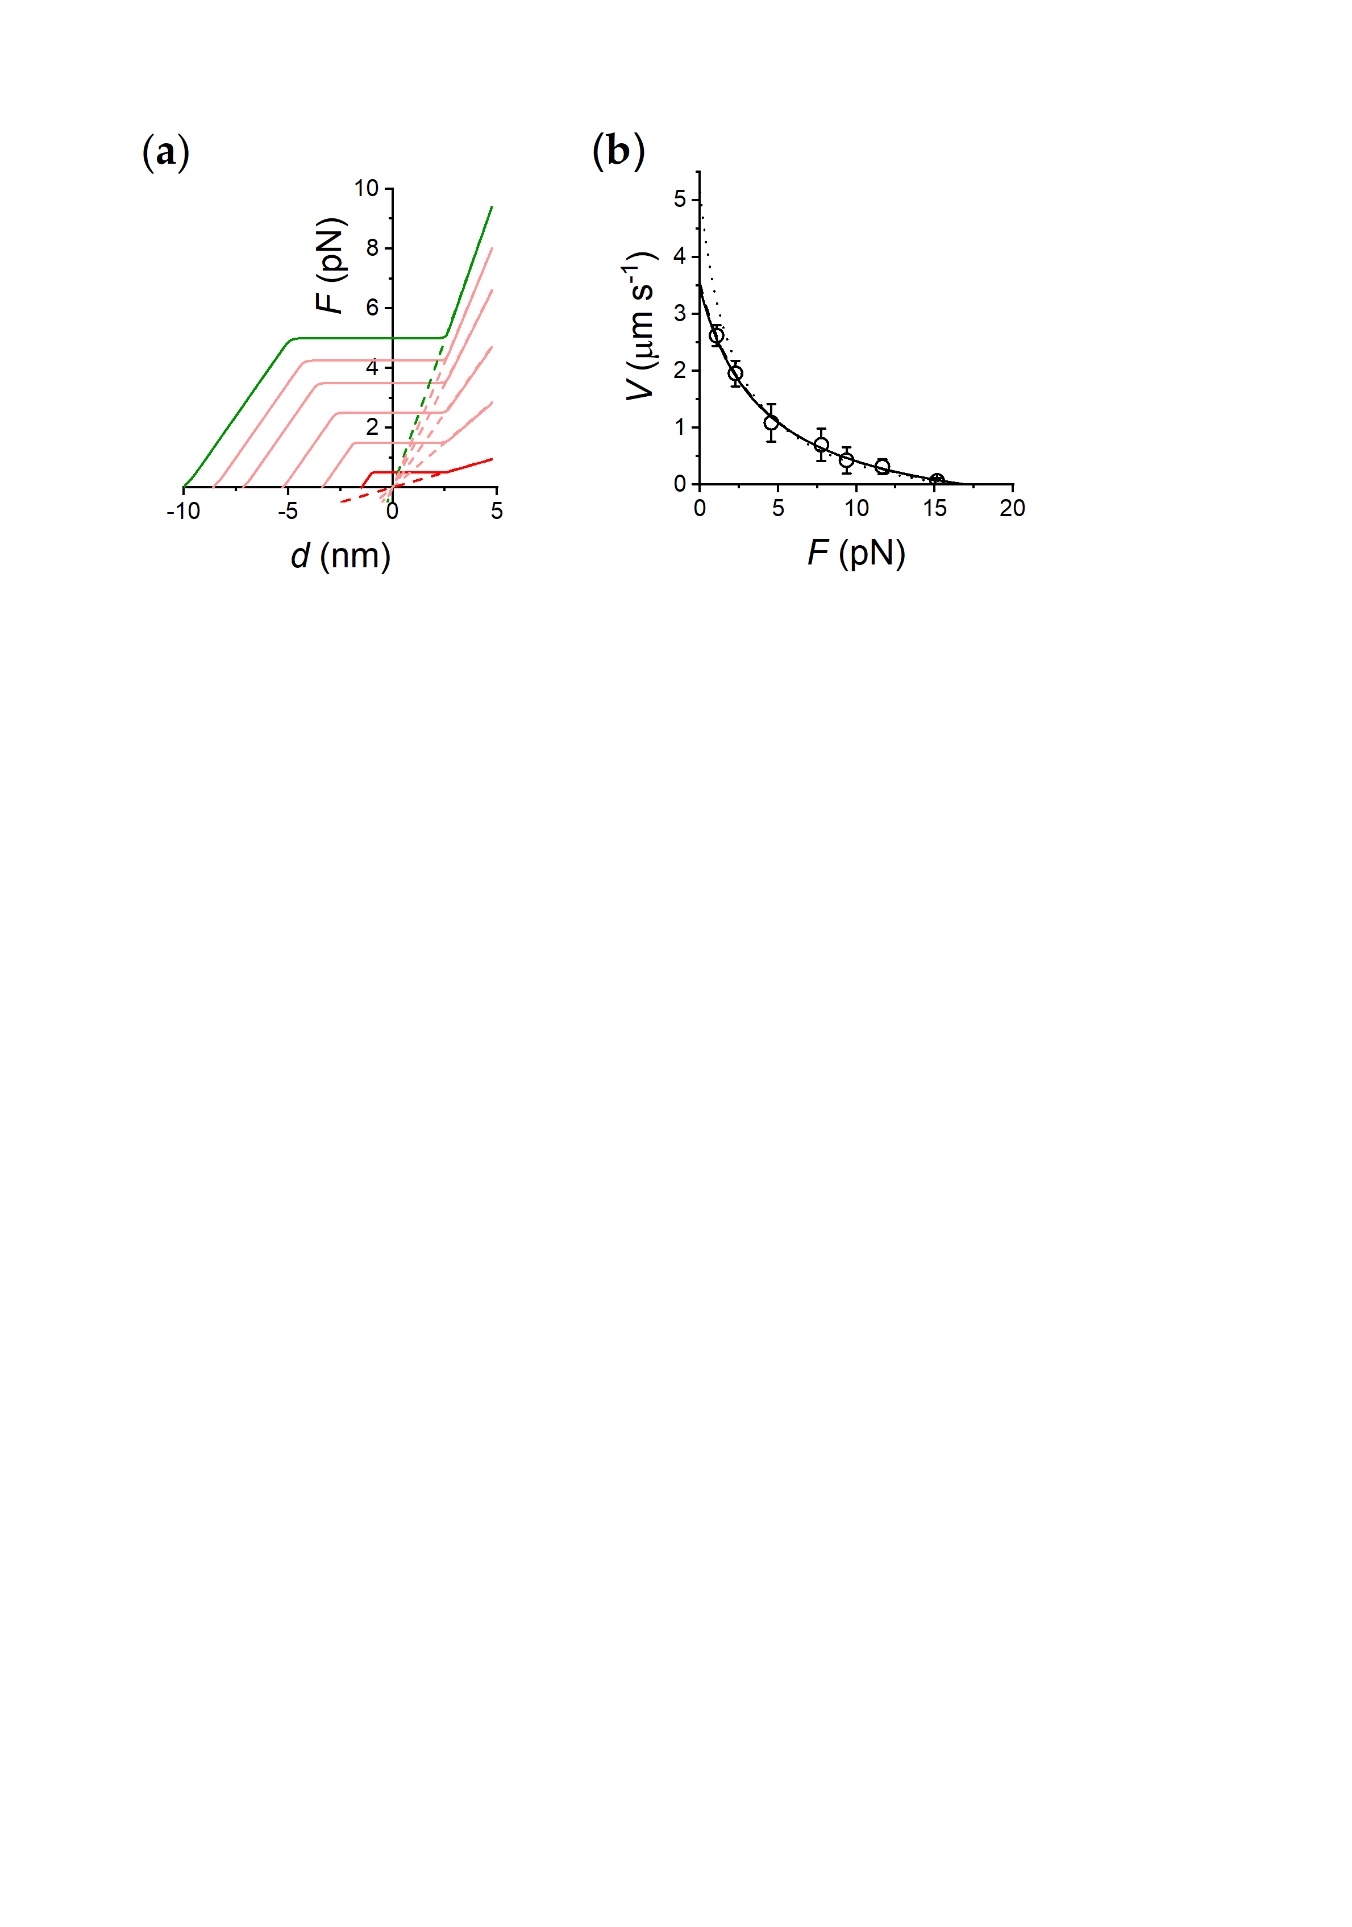
**

**Supplementary Fig. 2.** (**a**) Force profile of the attached states of the motor as a function of *d*. A1 state, dashed line and A2 state, continuous line. Green, force profile of correctly oriented motors; red, of motors 180° away from the correct orientation; pink, four profiles corresponding to four intermediate motor orientations. (**b**) *F*-*V* relation simulated for a number of available heads *N* = 16 with the model in Ref. [10] (dotted line) and with the implemented version that takes into account the effect of the random orientation of motors on both force and the step size (continuous line). Experimental data (circles) and their fit with Hill equation (dashed line) from Fig. 2d.
